# Supplementary material for: Identification of a Solid Stem Suppressor Gene Su-TdDof in Synthetic Hexaploid Wheat Syn-SAU-117
Source: Preprints.org preprint supplement (doi:10.20944/preprints202307.1403.v1), 2023-07-20
Supplement: Supplementary file 1 [file supplementary]

## Sheet: Table S1
Table S1 All gene annotations of the Su-TdDof genomic region in chromosome 7DS of Chinese Spring
Gene	Product	Start	End
TraesCS7D02G018300LC	Endonuclease/exonuclease/phosphatase family protein	6712586	6712816
TraesCS7D02G018400LC	Transposon protein, putative, Mutator sub-class, expressed	6738093	6739124
TraesCS7D02G018500LC	DNA helicase	6740303	6740530
TraesCS7D02G015400	Hydroxycinnamoyl-CoA shikimate/quinate hydroxycinnamoyltransferase	6750319	6754952
TraesCS7D02G015500	Protein CWC15 like	6769044	6772446
TraesCS7D02G015600	Putative receptor-kinase	6779575	6782826
TraesCS7D02G018600LC	ATP-dependent Clp protease ATP-binding subunit ClpX	6786592	6786885
TraesCS7D02G018700LC	Transposon TX1 uncharacterized	6786969	6787838
TraesCS7D02G018800LC	Polynucleotidyl transferase, ribonuclease H-like superfamily protein	6789691	6790689
TraesCS7D02G015700	Chaperone protein DnaK	6792867	6794681
TraesCS7D02G015800	RING/FYVE/PHD zinc finger superfamily protein	6819191	6819883
TraesCS7D02G018900LC	E3 ubiquitin-protein ligase SINA-like 2	6914744	6915283
TraesCS7D02G019000LC	Gag polyprotein	6943288	6943593
TraesCS7D02G019100LC	Maturase K	6943771	6944171
TraesCS7D02G015900	ARF-GAP domain 15	7070222	7070798
TraesCS7D02G016000	Elongation factor G, mitochondrial	7072379	7072660
TraesCS7D02G016100	Putative thiol peptidase family protein	7072771	7075075
TraesCS7D02G016200	Stress response NST1-like protein	7078657	7079358
TraesCS7D02G019200LC	Transposon protein, putative, Mutator sub-class	7082698	7083099
TraesCS7D02G019300LC	Transposon protein, putative, Mutator sub-class	7093945	7101929
TraesCS7D02G019400LC	Transposon protein, putative, Mutator sub-class	7102287	7102487
TraesCS7D02G019500LC	Transposon protein, putative, Mutator sub-class	7160179	7160691
TraesCS7D02G019600LC	GRF zinc finger family protein	7169788	7170235
TraesCS7D02G016300	Pectin lyase-like superfamily protein	7171203	7173625
TraesCS7D02G019700LC	Disease resistance protein (TIR-NBS-LRR class) family	7191086	7191374
TraesCS7D02G019800LC	P-loop containing nucleoside triphosphate hydrolases superfamily protein	7192389	7198345
TraesCS7D02G019900LC	Leucine-rich repeat receptor-like protein kinase family protein	7291866	7292793
TraesCS7D02G016400	Kelch repeat-containing protein	7297433	7299794
TraesCS7D02G016500	50S ribosomal protein L6	7300111	7302490
TraesCS7D02G016600	Tsl-kinase interacting protein 1	7303583	7305480
TraesCS7D02G016700	WAT1-related protein	7444673	7446041
TraesCS7D02G016800	Ferredoxin--NADP reductase	7446638	7449465
TraesCS7D02G016900	SKP1-like protein	7453881	7455679
TraesCS7D02G020000LC	Methanogen homoaconitase small subunit 2	7457128	7457475
TraesCS7D02G020100LC	B3 domain-containing protein family	7457881	7458450
TraesCS7D02G017000	B3 domain-containing protein	7465460	7466113
TraesCS7D02G020200LC	FAR1-related sequence 5	7473633	7476011
TraesCS7D02G017100	Aspartic proteinase nepenthesin-1	7494387	7495838
TraesCS7D02G017200	Aspartic proteinase nepenthesin-1	7534989	7536374
TraesCS7D02G020300LC	carbohydrate esterase, putative (DUF303)	7545535	7545963
TraesCS7D02G017300	NBS-LRR-like resistance protein	7548344	7550551
TraesCS7D02G017400	Disease resistance protein (TIR-NBS-LRR class)	7561110	7563040
TraesCS7D02G020400LC	ATP-dependent Clp protease proteolytic subunit	7565362	7565742
TraesCS7D02G020500LC	DNA-(apurinic or apyrimidinic site) lyase	7591369	7591773
TraesCS7D02G017500	Ta11-like non-LTR retrotransposon	7592292	7593062
TraesCS7D02G017600	NBS-LRR-like resistance protein	7597367	7609765
TraesCS7D02G020600LC	Bifunctional glutamine synthetase adenylyltransferase/adenylyl-removing enzyme	7618522	7619921
TraesCS7D02G020700LC	Disease resistance protein (NBS-LRR class) family	7712848	7714299
TraesCS7D02G020800LC	50S ribosomal protein L16	7717946	7718533
TraesCS7D02G017700	NBS-LRR-like resistance protein	7750069	7753524
TraesCS7D02G017800	Ribonuclease H-like superfamily protein	7796916	7797308
TraesCS7D02G020900LC	Disease resistance protein (TIR-NBS-LRR class)	7820235	7829853
TraesCS7D02G021000LC	TTF-type zinc finger protein with HAT dimerization domain	7864241	7864507
TraesCS7D02G021100LC	Fructose-bisphosphate aldolase	7875904	7878630
TraesCS7D02G017900	NBS-LRR disease resistance protein-like protein	7924403	7925524
TraesCS7D02G021200LC	60S ribosomal protein L36	7977116	7980604
TraesCS7D02G018000	Disease resistance protein	8030422	8034262
TraesCS7D02G021300LC	Carbohydrate esterase plant-like protein	8034926	8035267
TraesCS7D02G021400LC	Polynucleotidyl transferase, ribonuclease H-like superfamily protein	8051404	8052552
TraesCS7D02G021500LC	Disease resistance protein (NBS-LRR class) family	8052773	8055352
TraesCS7D02G021600LC	Retrovirus-related Pol polyprotein from transposon TNT 1-94	8059293	8059979
TraesCS7D02G021700LC	Retrovirus-related Pol polyprotein from transposon TNT 1-94	8060031	8060342
TraesCS7D02G021800LC	disease resistance protein (TIR-NBS-LRR class)	8060744	8061496
TraesCS7D02G021900LC	NBS-LRR-like resistance protein	8074161	8088096
TraesCS7D02G022000LC	Zinc finger MYM-type-like protein	8079574	8081348
TraesCS7D02G018100	TTF-type zinc finger protein with HAT dimerization domain-containing protein	8081759	8082067
TraesCS7D02G018200	NBS-LRR-like resistance protein	8177099	8179789
TraesCS7D02G022100LC	Disease resistance protein (TIR-NBS-LRR class) family	8179831	8180526
TraesCS7D02G022200LC	Ethanolamine ammonia-lyase light chain	8180538	8181017
TraesCS7D02G022300LC	AP2 domain-containing transcription factor	8180704	8186847
TraesCS7D02G018300	NBS-LRR disease resistance protein	8189787	8193974
TraesCS7D02G022400LC	Transposon protein, putative, Pong sub-class	8219782	8220606
TraesCS7D02G018400	NBS-LRR disease resistance protein-like protein	8223605	8224570
TraesCS7D02G022500LC	NBS-LRR-like resistance protein	8224902	8226125
TraesCS7D02G022600LC	intracellular protein transporter	8226263	8226712
TraesCS7D02G018500	NBS-LRR-like resistance protein	8233614	8235296
TraesCS7D02G022700LC	Disease resistance protein (NBS-LRR class) family	8235297	8236838
TraesCS7D02G018600	Carbohydrate esterase, putative (DUF303)	8250804	8251276
TraesCS7D02G018700	NBS-LRR-like resistance protein	8252510	8256016
TraesCS7D02G022800LC	Melanoma-associated antigen 3	8281490	8282368
TraesCS7D02G018800	MLO-like protein	8291679	8333650
TraesCS7D02G018900	Disease resistance protein (NBS-LRR class) family	8343559	8347414
TraesCS7D02G022900LC	MYB transcription factor	8349313	8349840
TraesCS7D02G023000LC	Disease resistance protein (NBS-LRR class) family	8350697	8353371
TraesCS7D02G019000	Regulatory protein NPR1	8353564	8356531
TraesCS7D02G023100LC	Glutathione S-transferase	8369251	8370068
TraesCS7D02G019100	carbohydrate esterase, putative (DUF303)	8375937	8376843
TraesCS7D02G019200	Glycosyltransferase	8380410	8381939
TraesCS7D02G023200LC	Glutathione S-transferase	8396485	8416035
TraesCS7D02G019300	Ankyrin repeat protein family-like protein	8416357	8424829
TraesCS7D02G019400	Glutathione S-transferase	8432828	8433439
TraesCS7D02G019500	Carbohydrate esterase, putative (DUF303)	8436087	8436867
TraesCS7D02G023300LC	Zinc finger MYM-type-like protein	8440858	8451286
TraesCS7D02G023400LC	Zinc finger MYM-type protein 5	8451296	8451514
TraesCS7D02G023500LC	Glycosyltransferase	8452000	8453967
TraesCS7D02G019600	Expansin-like protein	8462330	8463358
TraesCS7D02G019700	Fiber protein Fb34	8464833	8468976
TraesCS7D02G019800	Homeobox BEL1 protein	8478399	8480778
TraesCS7D02G023600LC	pleiotropic drug resistance 13	8479477	8479815
TraesCS7D02G023700LC	Retrovirus-related Pol polyprotein from transposon TNT 1-94	8549273	8550244
TraesCS7D02G023800LC	Retrovirus-related Pol polyprotein from transposon TNT 1-94	8550255	8550782
TraesCS7D02G019900	Cytochrome P450 family protein, expressed	8559750	8561421
TraesCS7D02G020000	Bifunctional inhibitor/lipid transfer protein/seed storage 2S albumin superfamily protein	8599018	8599446
TraesCS7D02G023900LC	Extracellular superoxide dismutase [Cu-Zn]	8687805	8699321
TraesCS7D02G020100	Bifunctional inhibitor/lipid-transfer protein/seed storage 2S albumin superfamily protein	8699079	8699414
TraesCS7D02G020200	F-box family protein	8745802	8747429
TraesCS7D02G020300	F-box protein	8819102	8820064
TraesCS7D02G024000LC	Receptor kinase-like protein	8827238	8828812
TraesCS7D02G024100LC	Protein FRA10AC1	8844162	8846951
TraesCS7D02G024200LC	F-box domain containing protein	8890711	8891430
TraesCS7D02G024300LC	SacI homology domain-containing protein / WW domain-containing protein	8897201	8897521
TraesCS7D02G020400	Benzyl alcohol O-benzoyltransferase	8981202	8983242
TraesCS7D02G024400LC	Benzyl alcohol O-benzoyltransferase	8989102	8989458
TraesCS7D02G020500	RING/U-box superfamily protein	9032535	9033056
TraesCS7D02G024500LC	Transposase	9034179	9034659
TraesCS7D02G024600LC	Endonuclease/exonuclease/phosphatase family protein	9038726	9039046
TraesCS7D02G024700LC	Retrotransposon protein, putative, unclassified	9040877	9041410
TraesCS7D02G024800LC	Agmatine coumaroyltransferase-2	9051500	9052914
TraesCS7D02G024900LC	GRF zinc finger family protein	9055758	9056310
TraesCS7D02G025000LC	Queuine tRNA-ribosyltransferase	9063411	9063737
TraesCS7D02G020600	Protein kinase family protein	9088835	9090427
TraesCS7D02G025100LC	Phosphoenolpyruvate carboxykinase （ATP）	9131870	9132106
TraesCS7D02G025200LC	Granule-bound starch synthase 1, chloroplastic/amyloplastic	9169856	9170194
TraesCS7D02G025300LC	LINE-1 reverse transcriptase-like protein	9170615	9171414
TraesCS7D02G025400LC	Serine hydroxymethyltransferase 6	9172693	9173115
TraesCS7D02G025500LC	Serine/threonine protein phosphatase 7 long form isogeny	9179334	9179828
TraesCS7D02G025600LC	Receptor-kinase, putative	9182468	9185647
TraesCS7D02G025700LC	F-box protein	9224394	9224786
TraesCS7D02G025800LC	Pentatricopeptide repeat (PPR) superfamily protein	9280433	9280932
TraesCS7D02G025900LC	PST19	9281515	9300077
TraesCS7D02G020700	NBS-LRR disease resistance protein, putative	9304479	9308848
TraesCS7D02G020800	Disease resistance protein (NBS-LRR class) family	9309693	9313872
TraesCS7D02G026000LC	Protein FAR1-RELATED SEQUENCE 5	9346911	9347621
TraesCS7D02G026100LC	F-box protein	9355177	9360980
TraesCS7D02G020900	Benzyl alcohol O-benzoyltransferase	9377784	9379298
TraesCS7D02G026200LC	Aspartate carbamoyltransferase	9387574	9388295
TraesCS7D02G026300LC	Retrotransposon protein, putative, unclassified	9391020	9391859
TraesCS7D02G026400LC	HXXXD-type acyl-transferase family protein	9392000	9393701
TraesCS7D02G021000	RING/U-box superfamily protein	9398466	9398978
TraesCS7D02G026500LC	LINE-1 retrotransposable element ORF2 protein	9413898	9414590
TraesCS7D02G026600LC	RNA-directed DNA polymerase (reverse transcriptase) related family protein	9415714	9416013
TraesCS7D02G021100	BURP domain protein RD22	9458292	9462258
TraesCS7D02G026700LC	BURP domain protein RD22	9639065	9641242
TraesCS7D02G026800LC	BURP domain protein RD22	9772749	9773487
TraesCS7D02G026900LC	NADH dehydrogenase subunit F	9848091	9848444
TraesCS7D02G027000LC	NADH dehydrogenase subunit 5	9848483	9862622
TraesCS7D02G027100LC	NADH dehydrogenase subunit F	9862688	9862933
TraesCS7D02G027200LC	Agmatine coumaroyltransferase-2	9863250	9864232
TraesCS7D02G027300LC	Altered inheritance of mitochondria protein 9, mitochondrial	9923884	9924234
TraesCS7D02G027400LC	Kelch repeat-containing F-box family protein, putative, expressed	9924458	9924703
TraesCS7D02G027500LC	RING finger protein	9930254	9930640
TraesCS7D02G027600LC	Alpha/beta-Hydrolases superfamily protein	9969795	9975158
TraesCS7D02G027700LC	F-box family protein	10009085	10010390
TraesCS7D02G026600LC	RNA-directed DNA polymerase (reverse transcriptase) related family protein	9415714	9416013
TraesCS7D02G021100	BURP domain protein RD22	9458292	9462258
TraesCS7D02G026700LC	BURP domain protein RD22	9639065	9641242
TraesCS7D02G026800LC	BURP domain protein RD22	9772749	9773487
TraesCS7D02G026900LC	NADH dehydrogenase subunit F	9848091	9848444
TraesCS7D02G027000LC	NADH dehydrogenase subunit 5	9848483	9862622
TraesCS7D02G027100LC	NADH dehydrogenase subunit F	9862688	9862933
TraesCS7D02G027200LC	Agmatine coumaroyltransferase-2	9863250	9864232
TraesCS7D02G027300LC	Altered inheritance of mitochondria protein 9, mitochondrial	9923884	9924234
TraesCS7D02G027400LC	Kelch repeat-containing F-box family protein, putative, expressed	9924458	9924703
TraesCS7D02G027500LC	RING finger protein	9930254	9930640
TraesCS7D02G027600LC	Alpha/beta-Hydrolases superfamily protein	9969795	9975158
TraesCS7D02G027700LC	F-box family protein	10009085	10010390
TraesCS7D02G027800LC	Rad23 UV excision repair protein family	10016646	10024259
TraesCS7D02G021200	Protein kinase family protein	10034946	10038420
TraesCS7D02G027900LC	NBS-LRR-like resistance protein	10038711	10039529
TraesCS7D02G028000LC	LINE-1 reverse transcriptase like	10040579	10041286
TraesCS7D02G028100LC	Retrovirus-related Pol polyprotein LINE-1	10041590	10042021
TraesCS7D02G028200LC	Transposon TX1 uncharacterized	10042109	10042360
TraesCS7D02G028300LC	Retrotransposon protein, putative, unclassified	10042455	10043393
TraesCS7D02G021300	Disease resistance protein (NBS-LRR class) family	10047399	10054114
TraesCS7D02G021400	Retrovirus-related Pol polyprotein from transposon TNT 1-94	10049267	10050436
TraesCS7D02G021500	Lectin-like protein kinase	10057017	10057826
TraesCS7D02G028400LC	Retrotransposon protein, putative, unclassified	10068850	10069170
TraesCS7D02G021600	F-box protein	10086134	10088068
TraesCS7D02G028500LC	70 kDa heat shock protein	10102934	10115655
TraesCS7D02G028600LC	SPOC domain/Transcription elongation factor S-II protein	10145464	10145862
TraesCS7D02G021700	F-box protein	10149898	10151109
TraesCS7D02G028700LC	Retrovirus-related Pol polyprotein from transposon TNT 1-94	10341617	10342474
TraesCS7D02G021800	F-box protein	10465028	10465609
TraesCS7D02G028800LC	Disease resistance protein (NBS-LRR class) family	10471579	10472277
TraesCS7D02G022000	receptor-like protein kinase 1	10473384	10474726
TraesCS7D02G022100	Disease resistance protein (NBS-LRR class) family	10477394	10480078
TraesCS7D02G022200	Protein kinase family protein	10480193	10483005
TraesCS7D02G022300	Disease resistance protein (NBS-LRR class) family	10495622	10501217
TraesCS7D02G022400	Disease resistance protein (NBS-LRR class) family	10503784	10508254
TraesCS7D02G028900LC	Rust resistance-like protein RP1	10512200	10514702
TraesCS7D02G029000LC	Transposon protein, putative, Mutator sub-class	10520575	10521054
TraesCS7D02G029100LC	Retrovirus-related Pol polyprotein from transposon TNT 1-94	10554752	10555360
Bold: Solid Stem Related Genes

## Sheet: Table S2
Table S2 All gene annotations of the Su-TdDof genomic region in chromosome 7DS of Aegilops tauschii
Gene	Product	Start	End
AET7Gv20032700	Unknown	6864161	6865459
AET7Gv20032800	Unknown	6973824	6992362
AET7Gv20032900	Anthranilate N-benzoyl transferase protein	7492454	7494036
AET7Gv20033000	Unknown	7855204	7857876
AET7Gv20033100	Protein CWC15-A-like protein	8098885	8099849
AET7Gv20033200	Protein kinase-like domain superfamily	8461281	8472932
AET7Gv20033300	Unknown	8464712	8472098
AET7Gv20033400	Unknown	6662500	6686910
ENSRNA050031973	Plant signal recognition particle RNA	6698320	6698622
AET7Gv20033500	Unknown	6698328	6698618
ENSRNA050031975	Plant signal recognition particle RNA	6741670	6741972
ENSRNA050031974	Plant signal recognition particle RNA	6806461	6806763
AET7Gv20033600	Unknown	6806469	6806757
AET7Gv20033700	Uncharacterized protein	6813005	6813315
ENSRNA050031968	Plant signal recognition particle RNA	6814027	6814330
AET7Gv20033800	Unknown	6814047	6814394
ENSRNA050031978	Plant signal recognition particle RNA	6815731	6816033
AET7Gv20033900	Unknown	6815750	6815998
ENSRNA050031976	Plant signal recognition particle RNA	6858249	6858546
AET7Gv20034000	Unknown	6858257	6858536
AET7Gv20034100	Uncharacterized protein	6859812	6860039
ENSRNA050031977	Plant signal recognition particle RNA	6860905	6861171
AET7Gv20034200	Polygalacturonase	6864161	6865459
AET7Gv20033900	Unknown	6815750	6815998
ENSRNA050031976	Plant signal recognition particle RNA	6858249	6858546
AET7Gv20034000	Unknown	6858257	6858536
AET7Gv20034100	Uncharacterized protein	6859812	6860039
ENSRNA050031977	Plant signal recognition particle RNA	6860905	6861171
AET7Gv20034200	Polygalacturonase	6864161	6865459
ENSRNA050031970	Plant signal recognition particle RNA	6865947	6866248
AET7Gv20034300	Unknown	6865965	6866254
AET7Gv20034400	peptidase	6866715	6869657
AET7Gv20034500	Unknown	6869622	6869801
AET7Gv20034600	Uncharacterized protein	6873980	6876955
AET7Gv20034700	Unknown	6912742	6913608
AET7Gv20034800	Zinc finger GRF-type domain-containing protein	6972405	6973497
AET7Gv20034900	Putative polygalacturonase	6973824	6992362
AET7Gv20035000	Unknown	6976998	6977289
AET7Gv20035100	Unknown	6993331	6993612
AET7Gv20035200	Unknown	6996528	6996819
ENSRNA050031967	Plant signal recognition particle RNA	6996532	6996835
AET7Gv20035300	Unknown	6997593	6997892
ENSRNA050031966	Plant signal recognition particle RNA	7000726	7001029
AET7Gv20035400	Unknown	7000730	7001021
ENSRNA050031969	Plant signal recognition particle RNA	7003134	7003437
AET7Gv20035500	Unknown	7003140	7003429
AET7Gv20035600	Protein binding	7039280	7042991
AET7Gv20035700	60S ribosomal protein L9	7043316	7045442
AET7Gv20035800	Unknown	7046071	7050160
AET7Gv20035900	Unknown	7046135	7046840
AET7Gv20036000	Unknown	7199169	7199320
AET7Gv20036100	Transmembrane transporter, WAT1-related protein	7199571	7203998
AET7Gv20036200	Erredoxin-NADP+ reductase, oxidoreductase	7200880	7204222
AET7Gv20036300	Ubiquitin-dependent protein catabolic process	7208254	7211079
AET7Gv20036400	DNA-binding transcription factor	7219496	7220489
AET7Gv20036500	Unknown	7226032	7226402
AET7Gv20036600	Aspartic proteinase nepenthesin-1	7247923	7249474
AET7Gv20036600	Aspartic proteinase nepenthesin-1	7247923	7249474
AET7Gv20036700	Unknown	7282974	7283729
AET7Gv20036800	Unknown	7285820	7287589
AET7Gv20036900	Unknown	7291694	7302556
AET7Gv20037000	Unknown	7292479	7295577
AET7Gv20037100	Unknown	7295683	7300919
AET7Gv20037200	Unknown	7301249	7302439
AET7Gv20037300	Rx N-terminal domain containing protein	7308480	7313623
AET7Gv20037400	Unknown	7330743	7330898
AET7Gv20037500	ADP binding	7422847	7500475
AET7Gv20037600	Unknown	7433511	7434719
AET7Gv20037700	ADP binding	7436216	7442377
AET7Gv20037800	ADP binding	7468767	7475719
AET7Gv20037900	Unknown	7468951	7473774
AET7Gv20038000	ADP binding	7492454	7494036
AET7Gv20038100	Unknown	7604801	7605380
AET7Gv20038200	Sialate O-acetylesterase domain-containing protein	7650312	7652316
AET7Gv20038300	Disease resistance protein RGA2	7651992	7656694
AET7Gv20038400	Unknown	7668717	7669314
AET7Gv20038500	Unknown	7668776	7669620
AET7Gv20038600	Unknown	7670153	7708458
AET7Gv20038700	Unknown	7707146	7707775
AET7Gv20038800	Disease resistance protein RPP13	7713529	7717366
AET7Gv20038900	Regulatory protein NPR1	7720290	7726555
AET7Gv20039000	glutathione transferase	7738638	7813573
AET7Gv20039100	Sialate O-acetylesterase domain-containing protein	7754881	7756206
AET7Gv20039200	Glycosyltransferase	7759322	7833638
AET7Gv20039300	ANK_REP_REGION domain-containing protein	7794319	7802755
AET7Gv20039400	Unknown	7820645	7821501
AET7Gv20039500	Unknown	7830740	7831289
AET7Gv20039600	UDP-glycosyltransferase	7831752	7832921
AET7Gv20039700	Expansin Protein	7838142	7839650
AET7Gv20039800	Uncharacterized protein	7840102	7844276
AET7Gv20039900	Unknown	7844144	7844278
AET7Gv20040000	Homeobox like protein BEL1	7855204	7857876
AET7Gv20040100	Unknown	7883015	7883522
AET7Gv20040200	Cytochrome P450 76C2	8006724	8008584
AET7Gv20040300	Unknown	8055008	8056072
AET7Gv20040400	Unknown	8055637	8133355
AET7Gv20040500	Unknown	8055637	8164534
AET7Gv20040600	Unknown	8093324	8093715
AET7Gv20040700	36.4 kDa proline-rich protein	8098885	8099849
AET7Gv20040800	Unknown	8122394	8122852
AET7Gv20040900	Unknown	8162126	8162802
AET7Gv20041000	Unknown	8188213	8189016
AET7Gv20041100	Unknown	8201053	8324649
AET7Gv20041200	Protein binding	8260042	8262030
AET7Gv20041300	Putative serine/threonine-protein kinase-like protein CCR3	8267643	8270353
AET7Gv20041400	Unknown	8285543	8286233
AET7Gv20041500	Unknown	8285546	8288945
AET7Gv20041600	Unknown	8291921	8306342
AET7Gv20041700	F-box domain-containing protein	8323754	8325829
AET7Gv20041800	Unknown	8333182	8333545
AET7Gv20041900	Unknown	8337892	8338415
AET7Gv20042000	Unknown	8377689	8378237
AET7Gv20042300	Acyltransferase	8419113	8420685
AET7Gv20042400	Zinc finger GRF-type domain-containing protein	8425143	8425899
AET7Gv20042500	Mitogen-activated protein kinase kinase 1, B3 domain-containing protein	8461281	8472932
AET7Gv20042700	Unknown	8523151	8523753
AET7Gv20042800	Unknown	8548603	8552152
AET7Gv20042900	Unknown	8556696	8557229
AET7Gv20043100	Unknown	8604845	8604976
AET7Gv20043200	Unknown	8627333	8628843
AET7Gv20043300	Protein binding	8646421	8654222
AET7Gv20043400	Unknown	8700461	8701031
AET7Gv20043500	Unknown	8700815	8701094
AET7Gv20043600	Unknown	8701779	8702140
AET7Gv20043700	Lectin-domain containing receptor kinase A4.2	8728613	8729674
AET7Gv20043800	Unknown	8744962	8745701
AET7Gv20043900	Unknown	8747336	8755205
AET7Gv20044000	Disease resistance protein RPP13, Lectin-domain containing receptor kinase A4.2	8765432	8772280
AET7Gv20044100	Lectin DB58	8774597	8775894
AET7Gv20044200	Unknown	8869155	8870865
AET7Gv20044300	Unknown	8869178	8874997
Bold: Solid Stem Related Genes

## Sheet: Table S3
Table S3 Differentially expressed gene annotations of the Su-TdDof genomic region in chromosome 7DS of Chinese Spring
Gene	Product	Start	End
TraesCS7D02G015500	Protein CWC15 like	6768821	6772564
TraesCS7D02G016200	Stress response NST1-like protein	7077108	7079567
TraesCS7D02G016300	Pectin lyase-like superfamily protein	7171203	7173625
TraesCS7D02G016500	50S ribosomal protein L6	7300247	7302490
TraesCS7D02G016800	Ferredoxin--NADP reductase	7446366	7449642
TraesCS7D02G016900	SKP1-like protein	7453756	7455809
TraesCS7D02G021200LC	60S ribosomal protein L36	7977211	7980537
TraesCS7D02G022100LC	Disease resistance protein (TIR-NBS-LRR class) family	8179831	8180526
TraesCS7D02G019700	Fiber protein Fb34	8465109	8468951
TraesCS7D02G024300LC	SacI homology domain-containing protein/WW domain containing protein	8897201	8897521
TraesCS7D02G021100	BURP domain protein RD22	9458258	9462540
TraesCS7D02G027600LC	Alpha/beta-Hydrolases superfamily protein	9969795	9975158
Bold: Solid Stem Related Genes

## Sheet: Table S4
Table S4 Differentially expressed gene annotations of the Su-TdDof genomic region in chromosome 7DS of Aegilops tauschii
Gene	Product	Start	End
AET7Gv20034200	Polygalacturonase, hydrolase, acting on sugar bonds	6864161	6865459
AET7Gv20034900	Putative polygalacturonase	6973824	6992362
AET7Gv20038000	ADP binding	7492454	7494036
AET7Gv20040000	Homeobox like protein BEL1	7855204	7857876
AET7Gv20040700	36.4 kDa proline-rich protein	8098885	8099849
AET7Gv20042500	Mitogen-activated protein kinase kinase 1, B3 domain-containing protein	8461281	8472932
AET7Gv20042600	Lectin-domain containing receptor kinase A4.2, Disease resistance protein RPP13	8464712	8472098
Bold: Solid Stem Related Genes
